# Supplementary material for: Unifying Concept of Serotonin Transporter-associated Currents
Source: PubMed Central journal article supplement — J Biol Chem. 2011 Nov 9;287(1):438–45. doi: 10.1074/jbc.M111.304261 (PMC3249096; doi:10.1074/jbc.m111.304261), 2011-11-09

**Suppl-Figure-1:** Ibogaine does not induce currents in *Xenopus laevis* oocytes expressing hSERT. *Xenopus laevis* expressing hSERT were voltage clamped using the two electrodes voltage clamp technique and continuously superfused with buffer solution either containing 100 mM  $\text{Li}^+$  (white bar) or 100 mM  $\text{Na}^+$  (black bar).  $\text{Li}^+$  caused a leak current that was decreased by  $\text{Na}^+$ . When Ibogaine was applied at the indicated concentrations no change in holding current amplitude was visible.

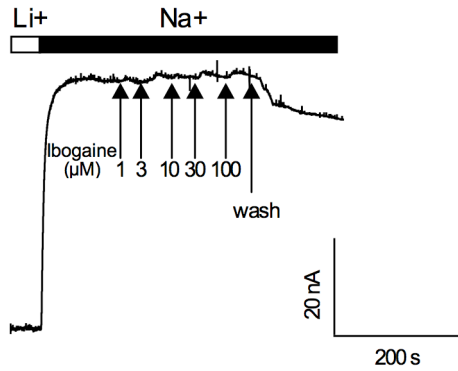

Supplement: supp_M111.304261_jbc.M111.304261-1.pdf [file supp_M111.304261_jbc.M111.304261-1.pdf]
